# Supplementary material for: Vulnerability of diatom communities in the Peace–Athabasca Delta to environmental change
Source: PeerJ journal article supplement (doi:10.7717/peerj.5447), 2018-08-09
Supplement: SWQ_Raw_Data_2012-2015.xlsx [file SWQ_Raw_Data_2012-2015.xlsx]

## Sheet: June 2012
Location	Matrix	Sample Type	PHOSPHOROUS TOTAL	NITROGEN TOTAL
			MG/L	MG/L
PAD 1	WATER	DISCRETE	3.75	12.07
PAD 3	WATER	DISCRETE	0.369	1.716
PAD 4	WATER	DISCRETE	0.074	1.025
PAD 14	WATER	DISCRETE	0.114	1.506
PAD 33	WATER	DISCRETE	0.041	1.382
PAD 37	WATER	DISCRETE	0.041	2.184
PAD 38	WATER	DISCRETE	0.03	0.683

## Sheet: August 2012
Location	Matrix	Sample Type	PHOSPHOROUS TOTAL	NITROGEN TOTAL
			MG/L	MG/L
PAD 1	WATER	DISCRETE	0.112
PAD 3	WATER	DISCRETE	0.178	1.186
PAD 4	WATER	DISCRETE	0.06	0.876
PAD 14	WATER	DISCRETE	0.056	2.047
PAD 33	WATER	DISCRETE	0.114	2.559
PAD 37	WATER	TRIPLICATE	0.209	5.05
PAD 37	WATER	TRIPLICATE	0.189	4.03
PAD 37	WATER	TRIPLICATE	0.054	3.028
PAD 38	WATER	DISCRETE	0.014	0.476

## Sheet: June 2013
Location	Matrix	Sample Type	PHOSPHOROUS TOTAL	NITROGEN TOTAL
			MG/L	MG/L
PAD 1	WATER	DISCRETE	0.077	0.735
PAD 3	WATER	DISCRETE	0.079	0.604
PAD 4	WATER	TRIPLICATE	0.092	0.779
PAD 4	WATER	TRIPLICATE	0.095	0.74
PAD 4	WATER	TRIPLICATE	0.097	0.718
PAD 14	WATER	DISCRETE	0.018	1.668
PAD 33	WATER	DISCRETE	0.046	1.511
PAD 37	WATER	DISCRETE	0.056	1.761
PAD 38	WATER	DISCRETE	0.038	0.392

## Sheet: August 2013
Location	Matrix	Sample Type	PHOSPHOROUS TOTAL	NITROGEN TOTAL
			MG/L	MG/L
PAD 1	WATER	DISCRETE	0.313	0.964
PAD 3	WATER	DISCRETE	0.217	0.8
PAD 4	WATER	TRIPLICATE	0.056	0.916
PAD 4	WATER	TRIPLICATE	0.087	1.103
PAD 4	WATER	TRIPLICATE	0.076	1.004
PAD 14	WATER	DISCRETE	0.002	0.005
PAD 33	WATER	DISCRETE	0.045	0.047
PAD 37	WATER	DISCRETE	0.093	2.447
PAD 38	WATER	DISCRETE	0.019	0.449
PAD 94	WATER	DISCRETE	0.076	1.099
PAD 96	WATER	DISCRETE	0.478	2.421
PAD 97	WATER	DISCRETE	0.232	2.054

## Sheet: June 2014 
Location	Matrix	Sample Type	PH	SPECIFIC CONDUCTANCE	TURBIDITY	NITROGEN TOTAL DISSOLVED	PHOSPHOROUS TOTAL DISSOLVED	IRON DISSOLVED
			PH UNITS	USIE/CM	NTU	MG/L	MG/L	UG/L
PAD 1	WATER	DISCRETE	7.72	257	6.5	0.614	0.041	482
PAD 3	WATER	TRIPLICATE	7.98	279	2.6	0.721	0.035	274
PAD 3	WATER	TRIPLICATE	8.06	281	2.5	0.66	0.036	249
PAD 3	WATER	TRIPLICATE	7.97	280	2.1	0.661	0.041	309
PAD 4	WATER	DISCRETE	8.05	226	40	0.382	0.014	178
PAD 14	WATER	DISCRETE	7.83	193	0.8	1.29	0.009	344
PAD 33	WATER	DISCRETE	7.72	310	1.4	1.11	0.051	104
PAD 37	WATER	DISCRETE	9.09	283	2.9	1.61	0.029	162
PAD 38	WATER	DISCRETE	8.05	316	4.2	0.665	0.02	54.6
PAD 92	WATER	DISCRETE	9.33	150	0.7	1.35	0.012	6.3
PAD 93	WATER	DISCRETE	7.6	372	1.7	0.907	0.036	47.6
PAD 94	WATER	DISCRETE	7.49	191	1.8	1.21	0.048	117
PAD 96	WATER	DISCRETE	9.16	196	1.2	0.878	0.041	264
PAD 97	WATER	DISCRETE	8.92	177	1.3	1.23	0.05	242

## Sheet: August 2014 
Location	Matrix	Sample Type	PH	SPECIFIC CONDUCTANCE	TURBIDITY	NITROGEN TOTAL DISSOLVED	PHOSPHOROUS TOTAL DISSOLVED	IRON DISSOLVED
			PH UNITS	USIE/CM	NTU	MG/L	MG/L	UG/L
PAD 1	WATER	DISCRETE	7.6	375	5.3	1.34	0.063	269
PAD 3	WATER	TRIPLICATE	7.83	295	15	0.935	0.058	281
PAD 3	WATER	TRIPLICATE	7.89	296	12	0.933	0.055	517
PAD 3	WATER	TRIPLICATE	7.85	296	12	0.896	0.052	403
PAD 4	WATER	DISCRETE	7.94	407	10	0.757	0.025	191
PAD 14	WATER	DISCRETE	7.41	214	2.6	1.2	0.008	184
PAD 33	WATER	DISCRETE	7.78	448	1.1	1.67	0.069	102
PAD 37	WATER	TRIPLICATE	7.86	456	1.2	1.92	0.021	397
PAD 37	WATER	TRIPLICATE	7.8	454	3	2.04	0.027	291
PAD 37	WATER	TRIPLICATE	7.92	452	1	1.97	0.024	266
PAD 38	WATER	DISCRETE	7.94	313	1.1	0.439	0.011	37.5
PAD 92	WATER	DISCRETE	7.77	191	3	0.762	0.012	31.1
PAD 93	WATER	DISCRETE	7.76	354	1.7	0.762	0.054	36
PAD 94	WATER	DISCRETE	7.53	208	1.7	1.04	0.034	199
PAD 96	WATER	DISCRETE	8.28	181	0.9	0.768	0.026	228
PAD 97	WATER	DISCRETE	7.97	215	1.6	1.05	0.034	481
Location	Matrix	Sample Type	PH	Flag	SPECIFIC CONDUCTANCE	TURBIDITY	NITROGEN TOTAL DISSOLVED	NITROGEN TOTAL DISSOLVED	PHOSPHOROUS TOTAL DISSOLVED	Flag	IRON DISSOLVED	Flag	IRON TOTAL	Flag
			010301-L		002041-L	002081-L	007657-L	108767-L	015465-L		108725-L		108678-L
			PH UNITS		USIE/CM	NTU	MG/L	MG/L	MG/L		UG/L		UG/L
PAD 3	WATER	FIELD BLANK	5.82	L	0.9	0.05		0.015	0.002	L	0.5	L	3.1	L
PAD 3	WATER	TRAVEL BLANK	5.77	L	0.9	0.06		0.015	0.002	L	0.5	L	0.5	L
PAD 3	WATER	BOTTLE BLANK	5.71	L	0.9	0.05		0.015	0.002	L	1.8	L	0.5	L
PAD 3	WATER	TRAVEL BLANK	5.77		1	0.07	0.015		0.002	L	0.5	L	0.5	L	**
PAD 37	WATER	FIELD BLANK	5.78		0.9	0.06		0.015	0.002	L	0.5	L	0.5	L
PAD 37	WATER	TRAVEL BLANK	6.07	L	1.3	0.08		0.015	0.002	L	0.5	L	0.5	L

## Sheet: August 2015 
Location	Matrix	Sample Type	DISSOLVED IRON	TOTAL DISSOLVED NITROGEN	PH UNITS	TOTAL DISSOLVED PHOSPHORUS	SPECIFIC CONDUCTANCE	TURBIDITY
			UG/L	MG/L	PH UNITS	MG/L	USIE/CM	NTU
PAD 1	WATER	DISCRETE	1260	3.31	9.36	0.133	378	5.12
PAD 3	WATER	DISCRETE	2330	3.04	8.99	0.112	359	18.1
PAD 4	WATER	DISCRETE	513	1.04	8.78	0.04	318	6.92
PAD 92	WATER	DISCRETE	187	0.982	7.53	0.027	214	12.2
PAD 94	WATER	DISCRETE	733	1.8	7.17	0.089	403	9.68
PAD 38	WATER	DISCRETE	38.2	0.431	8.25	0.012	233	2.82
PAD 97	WATER	DISCRETE	73.2	1.59	8.08	0.062	286	12.8
PAD 96	WATER	DISCRETE	422	0.862	7.89	0.05	199	3.14
PAD 14	WATER	DISCRETE	1680	1.57	7.61	0.013	241	3.82
PAD 33	WATER	DISCRETE	127	1.44	7.62	0.018	448	1.03
PAD 37	WATER	TRIPLICATE	871	4.34	7.78	0.066	451	26.2
PAD 37	WATER	TRIPLICATE	2350	3.83	7.43	0.061	483	17
PAD 37	WATER	TRIPLICATE	694	3.79	7.58	0.054	456	18.7
PAD 93	WATER	TRIPLICATE	133	0.993	7.39	0.055	319	2.95
PAD 93	WATER	TRIPLICATE	130	0.916	7.22	0.045	314	4.12
PAD 93	WATER	TRIPLICATE	157	0.927	7.47	0.043	320	5.3
